# Supplementary material for: Non-pharmaceutical interventions and COVID-19 vaccination strategies in Senegal: a modelling study
Source: PubMed Central journal article supplement — BMJ Glob Health. 2022 Feb 22;7(2):e007236. doi: 10.1136/bmjgh-2021-007236 (PMC8882665; doi:10.1136/bmjgh-2021-007236), 2022-02-22
Supplement: bmjgh-2021-007236supp001.pdf [file bmjgh-2021-007236supp001.pdf]

## Supplementary Materials

### **Appendix 1: Mathematical model**

The CoMo (Covid19 International Modelling) SARS-CoV-2 model is an age-structured SEIRS model with infected compartments stratified by symptoms, severity and treatment seeking and access. The progression of individuals through the infection life cycle is represented by the diagram below.

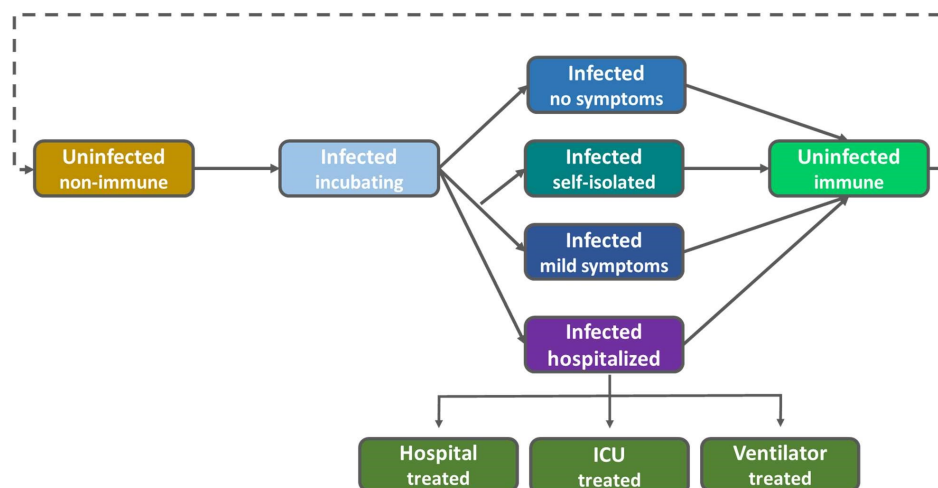

**Figure S1:** A diagram of the baseline model structure representing the unmitigated epidemic spread scenario. Source : Aguas R, *et al. BMJ Global Health* 2021; 5:e003126. doi: 10.1136

As individuals are infected, they transit through an incubation phase at the end of which they are fully infectious. At the end of this incubation period, individuals display very different symptomatology, with some never having any symptoms, while others require hospitalization. If a person is hospitalized, the model tracks their health care requirements (surge care bed, ICU bed, ventilator). Disease-induced mortality rates are heavily dependent on how severe the infection outcome is and whether individuals can receive the appropriate treatment. The model assumes that those who recover from infection will become immune. We allow for loss of immunity in the model but for the moment have set this parameter to be in the order of years.

The model interface can be found here: <https://comomodel.net/>. The model interface uses publicly available country-specific data on cases and mortality for COVID-19<sup>1</sup> for visual calibration of model parameters to user-selected baseline scenarios. More elaborate calibration methods are under consideration but are not considered to be a priority since the system is unidentifiable and therefore calibration will be entirely dependent on user-selected baseline scenarios. The equations for the basic model structure follow (Equation 1).

$$\begin{aligned}
\frac{dS}{dt} &= -S \circ \Lambda + \omega R + A \cdot S - \mu \cdot S + bP \\
\frac{dE}{dt} &= S \circ \Lambda - \gamma E + A \cdot E - \mu \cdot E \\
\frac{dI}{dt} &= \gamma (1 - p_{clin})(1 - p_{ihr}) \cdot E - \nu_I I + A \cdot I - \mu \cdot I \\
\frac{dC}{dt} &= \gamma p_{clin}(1 - p_{ihr}) \cdot E - \nu_I C + A \cdot C - \mu \cdot C \\
\frac{dR}{dt} &= \nu_I(I + C) + A \cdot R - \omega R - \mu \cdot R + (1 - \delta_H p_{hfr})\nu_H \cdot H + (1 - \delta_{H_c} p_{hfr})\nu_H \cdot H \\
&\quad + (1 - \delta_U p_{hfr})\nu_U \cdot U + (1 - \delta_{U_c} p_{hfr})\nu_U \cdot U + (1 - \delta_V p_{hfr})\nu_V \cdot V \\
&\quad + (1 - \delta_{V_c} p_{hfr})\nu_V \cdot V \\
\frac{dH}{dt} &= p_{ihr}(1 - p_U)(1 - p_{K_H})\gamma E - \nu_H H + A \cdot H - \mu \cdot H \\
\frac{dH_c}{dt} &= p_{ihr}(1 - p_U)p_{K_H}\gamma E - \nu_H H_c + A \cdot H_c - \mu \cdot H_c \\
\frac{dU}{dt} &= p_{ihr}p_U(1 - p_{K_U})(1 - p_V)\gamma E - \nu_U U + A \cdot U - \mu \cdot U \\
\frac{dU_c}{dt} &= p_{ihr}p_U p_{K_U}(1 - p_V)\gamma E - \nu_U U_c + A \cdot U_c - \mu \cdot U_c \\
\frac{dU_{cv}}{dt} &= p_{ihr}p_U p_{K_U} p_V \gamma E - \nu_V U_{cv} + A \cdot U_{cv} - \mu \cdot U_{cv} \\
\frac{dV}{dt} &= p_{ihr}p_U(1 - p_{K_U})(1 - p_{K_V})p_V \gamma E - \nu_V V + A \cdot V - \mu \cdot V \\
\frac{dV_c}{dt} &= p_{ihr}p_U(1 - p_{K_U})p_{K_V}p_V \gamma E - \nu_V V_c + A \cdot V_c - \mu \cdot V_c \\
P &= (S + E + I + C + R + H + H_c + U + U_c + U_{cv} + V + V_c) \\
s &= 1 + a \cos \left( 2\pi \frac{\left( t - \left( \frac{365.25\phi}{12} \right) + t_{in} \right)}{365.25} \right) \\
W &= W_{home} + W_{work} + W_{school} + W_{other} \\
\Lambda &= p s W \cdot \left( \frac{\rho E + I + C + \rho_s * (H + H_c + U + U_c + V + V_c)}{P} \right) \\
A &= \begin{pmatrix} \begin{pmatrix} -1 & 0 \\ 1 & -1 \end{pmatrix} & \dots & 0 \\ \vdots & \ddots & \begin{pmatrix} -1 & 0 \\ 1 & -1 \end{pmatrix} & \ddots & \vdots \\ 0 & \dots & \dots & \dots & \begin{pmatrix} -1 & 0 \\ 1 & 0 \end{pmatrix} \end{pmatrix} \\
p_{K_H} &= \begin{cases} 0 & \text{for } H < K_H \\ 1 & \text{for } H \geq K_H \end{cases} \\
p_{K_U} &= \begin{cases} 0 & \text{for } U < K_U \\ 1 & \text{for } U \geq K_U \end{cases} \\
p_{K_V} &= \begin{cases} 0 & \text{for } V < K_V \\ 1 & \text{for } V \geq K_V \end{cases}
\end{aligned}$$

Equation 1

## Non-pharmaceutical interventions

A series of non-pharmaceutical interventions were included in the model which can be switched on for specific periods of time, thus building a bespoke intervention package.

## Self-Isolation if Symptomatic

This is the practice of individuals with either a confirmed case of Covid-19 or with Covid-19 symptoms isolating themselves at home for a period of 7 days. The parameters governing this intervention are:

- Start Date: the start date of the protocol
- Duration: the duration of the protocol
- Coverage: the percentage of the population who will be able to self-isolate if they have symptoms or are a confirmed case
- Adherence: the percentage of the designated isolation period that self-isolated individuals adhere to the intervention

## Screening

This is a form of contact-tracing. Given enough testing capacity, it reflects how suspected contacts of confirmed cases are tested with a virological test. All individuals who test positive are then requested to self-isolate

- Start Date: the start date of additional screening
- Test Sensitivity: Probability that an infected person will test positive when screened.
- Suspected Contacts: number of people screened per reported case.
- Overdispersion: informs the probability of finding an infected person that is a known contact of a reported case, relative to random sampling (overdispersion = 1).
- Duration: duration of this additional protocol

## Social Distancing

Also known as physical distancing, this refers to the measures taken to prevent the spread of a contagious disease by maintaining a specific physical distance between individuals and reducing the number of times individuals come into close contact with each other. The parameters governing this intervention are:

- Start Date: the start date of the protocol
- Duration: the duration of the protocol
- Coverage: the percentage of the population who reduce their societal contacts (excluding those at home, work and school)
- Adherence: the percentage of the time that those practicing social distancing adhere to social distancing measures

## Handwashing

This indicates improvements in personal hygiene and reduction in risk behaviours (touching the face, nose or mouth), including the adoption of Personal Protection Equipment such as masks. The parameters governing this intervention are:

- Start Date: the start date of the protocol
- Duration: the duration of the protocol
- Efficacy: the effectiveness of personal hygiene measures in reducing the risk of infection per contact

## Working at Home

This indicates the effect of having workers working from home. The parameters governing this intervention are:

- Start Date: the start date of the protocol
- Duration: the duration of the protocol
- Efficacy: the reduction in work related contacts
- Home contacts inflation: increased numbers of home contacts due to increased number of hours spent at home

## School Closures

This indicates school closures and assumes that all schools in a country close at the same time. The parameters governing this intervention are:

- Start Date: the start date of the protocol
- Duration: the duration of the protocol
- Efficacy: defined as the reduction in contacts between school children when schools are closed
- Home contacts inflation: increased numbers of home contacts due to increased numbers of hours spent at home

## Shielding the Elderly

This intervention is designed to isolate a proportion of the elderly population and reduce their overall contacts. The parameters governing this intervention are:

- Start Date: the start date of the protocol
- Duration: the duration of the protocol
- Coverage: the percentage of the elderly population who are shielded
- Efficacy: defined as the reduction in overall contacts of the shielded elderly population
- Minimum age for elderly cocoon: the minimum age cut-off defining which people should protect themselves

## Travel Ban

This refers to a ban on international travel. The parameters governing this intervention are:

- Start Date: the start date of the protocol
- Duration: the duration of the protocol
- Efficacy: the reduction in imported cases per day (as a percentage)

## Voluntary home quarantine

This indicates how many people will voluntarily quarantine themselves at home for a specified number of days if a person they live with tests positive for Covid-19. The parameters governing this intervention are:

- Start Date: the start date of the protocol
- Duration: the duration of the protocol
- Days in quarantine for an average person

- Coverage: The percentage of people voluntarily quarantining themselves given they live with a known infectious case.
- Rate: Speed at which people decide to quarantine themselves if they live with a known infectious case.
- Decrease in the number of other contacts when voluntarily quarantining: refers to decreased mean numbers of contacts outside of the home while quarantining
- Increase in the number of contacts at home when voluntarily quarantining: refers to increased numbers of home contacts due to increased time spent at home while quarantining

## Lockdown

This refers to an emergency protocol that is categorized into three levels based on the efficacy or coverage of the various non-pharmaceutical interventions. The parameters governing this intervention are:

- Low-level lockdown (self-isolation 50%, social distancing 25%, cocoon 95%, hand-hygiene 5%)
  - Start Date: the start date of low-level lockdown protocols
  - Duration: the duration of low-level lockdown protocols

Mid-level lockdown (self-isolation 50%, social distancing 95%, school closure 85%, travel ban 95%, voluntary home quarantine 5%, working from home 50%, cocoon 95%, hand-hygiene 5%)

- Start Date: the start date of mid-level lockdown protocols
- Duration: the duration of mid-level lockdown protocols
- High-level lockdown (self-isolation 95%, social distancing 35%, school closure 85%, voluntary home quarantine 90%, working from home 75%, cocoon 95%, hand-hygiene 7.5%)
  - Start Date: the start date of high-level lockdown protocols
  - Duration: the duration of high-level lockdown protocols

## Table of variables

The model variables are defined in Table S1 below.

| Symbol          | Definition                                                                       |
|-----------------|----------------------------------------------------------------------------------|
| S               | Susceptible                                                                      |
| E               | Infected and incubating                                                          |
| I               | Infectious and asymptomatic following incubation                                 |
| C               | Infectious and mildly symptomatic following incubation                           |
| R               | Recovered and immune                                                             |
| H               | Severe infection: hospitalized                                                   |
| H <sub>c</sub>  | Severe infection: not hospitalized due to lack of capacity                       |
| U               | Severe infection: hospitalized in ICU                                            |
| U <sub>c</sub>  | Severe infection: hospitalized and requiring ICU but placed in surge ward        |
| U <sub>cv</sub> | Severe infection: hospitalized and requiring ventilator but placed in surge ward |
| V               | Severe infection: hospitalized in ICU and on a ventilator                        |
| V <sub>c</sub>  | Severe infection: hospitalized in ICU requiring a ventilator but not on one      |

**Table S1:** A list of model variables and their definitions.

## Table of parameters

| Symbol                       | Definition                                                                                                                          | Value | Unit               | Source                       |
|------------------------------|-------------------------------------------------------------------------------------------------------------------------------------|-------|--------------------|------------------------------|
| Demographics                 |                                                                                                                                     |       |                    |                              |
| $W_{home}$                   | Country-specific age-dependent contact matrix describing the number of potentially infectious contacts at home per person per day   | †     | day <sup>-1</sup>  | <sup>2</sup>                 |
| $W_{work}$                   | Country-specific age-dependent contact matrix describing the number of potentially infectious contacts at work per person per day   | †     | day <sup>-1</sup>  | <sup>2</sup>                 |
| $W_{school}$                 | Country-specific age-dependent contact matrix describing the number of potentially infectious contacts at school per person per day | †     | day <sup>-1</sup>  | <sup>2</sup>                 |
| $W_{other}$                  | Country-specific age-dependent contact matrix describing the number of potentially infectious societal contacts per person per day  | †     | day <sup>-1</sup>  | <sup>2</sup>                 |
| $\mu$                        | 1/Age-dependent non-Covid-19-related death rate                                                                                     | †     | days               | <sup>3</sup>                 |
| $b$                          | 1/ Age-dependent fertility rate                                                                                                     | †     | days               | <sup>3</sup>                 |
| $\alpha$                     | Ageing rate between age categories                                                                                                  | 0.2   | year <sup>-1</sup> |                              |
| Natural history of infection |                                                                                                                                     |       |                    |                              |
| $p$                          | Probability of infection given a single contact                                                                                     | †     | NA                 | <sup>4</sup>                 |
| $\gamma$                     | 1/duration of incubation period                                                                                                     | 3.5   | days               | <sup>5-7</sup>               |
| $\rho$                       | Relative infectiousness of incubating phase                                                                                         | 0.1   | NA                 | ‡                            |
| $p_{clin}$                   | Proportion of all infections that ever develop symptoms                                                                             | 0.55  | NA                 | <sup>8-10</sup>              |
| $\nu_I$                      | 1/duration of infectious phase post incubation                                                                                      | 4.5   | days               | <sup>5</sup>                 |
| $\rho_s$                     | Relative proportion of contacts for hospitalised patients                                                                           | 0.15  | NA                 | ‡                            |
| $\omega$                     | 1/duration of immunity                                                                                                              | 150   | years              | ‡                            |
| Seasonality                  |                                                                                                                                     |       |                    |                              |
| $\alpha$                     | Relative variation in viral transmissibility throughout the year (+- a proportion)                                                  | †     | NA                 | -                            |
| $\phi$                       | Month of peak in transmissibility                                                                                                   | †     | NA                 | -                            |
| Patient outcomes             |                                                                                                                                     |       |                    |                              |
| $p_{thr}$                    | Probability of an infection being severe (requiring hospitalisation) by age                                                         | †     | NA                 | <sup>3, 11-14</sup>          |
| $p_{hfr}$                    | Probability of a severe/hospitalised infection being fatal by age                                                                   | †     | NA                 | <sup>3, 11, 12, 14, 15</sup> |
| $\nu_H$                      | 1/Duration of hospitalised infection                                                                                                | †     | days               | <sup>16</sup>                |
| $\nu_U$                      | 1/Duration of ICU infection                                                                                                         | †     | days               | <sup>17, 18</sup>            |

|               |                                                                                                                            |      |      |          |
|---------------|----------------------------------------------------------------------------------------------------------------------------|------|------|----------|
| $\nu_V$       | 1/Duration of ventilated infection                                                                                         | †    | days | 5, 6, 15 |
| $\delta_H$    | Maximum probability of death for a hospitalised infection                                                                  | 0.35 |      | 3, 16    |
| $\delta_{Hc}$ | Maximum probability of death for an infection requiring hospitalisation that did not receive appropriate treatment         | 0.45 | NA   | 19       |
| $\delta_U$    | Maximum probability of death for a hospitalised infection requiring ICU admission                                          | 0.55 | NA   | 19, 20   |
| $\delta_{Uc}$ | Maximum probability of death for a hospitalised infection that would require ICU admission but was not admitted to the ICU | 0.8  | NA   | 19       |
| $\delta_V$    | Maximum probability of death for a hospitalised infection requiring a ventilator                                           | 0.8  | NA   | 19       |
| $\delta_{Vc}$ | Maximum probability of death for a hospitalised infection that would require a ventilator but did not get one              | 0.95 | NA   | 21       |
| $p_U$         | Probability of an infected patient needing ICU                                                                             | 0.5  | NA   | 13, 21   |
| $p_V$         | Probability of an infected patient needing ICU and a ventilator                                                            | 0.75 | NA   | 21       |
| $K_H$         | Standard hospital bed capacity                                                                                             | †    | NA   | -        |
| $K_U$         | ICU bed capacity                                                                                                           | †    | NA   | -        |
| $K_V$         | Ventilator capacity                                                                                                        | †    | NA   | -        |

**Table S2:** A list of the default parameter values of the model. These are subject to change when the model is applied to a new setting and/or with new information about covid-19. We have provided references to demonstrate that the default values lie within plausible ranges. † Country specific value; ‡ Assumed value (no reference found)

## **Appendix 2: Data and parameters for Senegal**

**Table S3:** NPI measures in Senegal from March 2<sup>nd</sup>, 2020 to July 1st, 2021

| Date       | NPIs interventions                                                                                                                      |
|------------|-----------------------------------------------------------------------------------------------------------------------------------------|
| 16/03/2020 | Schools and universities closed                                                                                                         |
| 20/03/2020 | International travel ban. Limited travel nationwide                                                                                     |
| 24/03/2020 | state of health emergency and curfew from 8pm to 6am                                                                                    |
| 19/04/2020 | Face masks are mandatory                                                                                                                |
| 11/05/2020 | Relaxation of the state of health emergency, curfew from 9pm to 5am, mosques and churches reopened                                      |
| 04/06/2020 | Curfew maintained from 11pm-5am. Lifting of the travel ban between regions                                                              |
| 25/06/2020 | Reopening of grades 10 and 13 subjects to national exams                                                                                |
| 12/11/2020 | Schools and universities reopened                                                                                                       |
| 01/12/2020 | Face masks are still mandatory                                                                                                          |
| 05/01/2021 | Travel restriction in the capital Dakar and Thies (the second city), curfew extended from 9pm to 5am, Restrictions on public gatherings |
| 23/02/2021 | Start of the vaccination campaign                                                                                                       |
| 19/03/2021 | End of the country's COVID-19 restrictions                                                                                              |

The CoMo template containing data adapted to Senegalese context is provided as supplemental material 2.

**Table S4:** Full list of parameter values used. We denote by "†" country specific parameters based on data and "-" parameters based on assumptions

| Sheet-Intervention | Parameter                                                                                                 | Value     | Unit        | Source     |
|--------------------|-----------------------------------------------------------------------------------------------------------|-----------|-------------|------------|
| Parameters         | Number of exposed people at start date                                                                    | 2.0188478 | Individuals | †Estimated |
| Parameters         | Proportion of population with partial immunity at the start date                                          | 0         |             | -          |
| Parameters         | Probability of infection given contact (0 to 0.2)                                                         | 0.02416   |             | †Estimated |
| Parameters         | Percentage of all asymptomatic infections that are reported                                               | 0         | %           | -          |
| Parameters         | Percentage of all symptomatic infections that are reported                                                | 6         | %           | -          |
| Parameters         | Percentage of denied hospitalisations that are reported                                                   | 90        | %           | †22        |
| Parameters         | Percentage of non-severe hospitalisations that are appropriately treated                                  | 90        | %           | †22        |
| Parameters         | Percentage of severe hospitalisations that are appropriately treated                                      | 90        | %           | †22        |
| Parameters         | Percentage of all asymptomatic infections in previously vaccinated people that are reported               | 0         | %           | -          |
| Parameters         | Percentage of all asymptomatic infections in previously vaccinated and exposed people that are reported   | 0         | %           | -          |
| Parameters         | Percentage of all asymptomatic infections in previously infected people that are reported                 | 0         | %           | -          |
| Parameters         | Percentage of all symptomatic infections in previously vaccinated people that are reported                | 0         | %           | -          |
| Parameters         | Percentage of all symptomatic infections in previously vaccinated and exposed people that are reported    | 0         | %           | -          |
| Parameters         | Percentage of all symptomatic infections in previously infected people that are reported                  | 0         | %           | -          |
| Parameters         | Percentage of all people dying outside the hospital with asymptomatic infections reported as covid-deaths | 0         | %           | -          |
| Parameters         | Percentage of all people dying outside the hospital with symptomatic infections reported as covid-deaths  | 10        | %           | -          |
| Parameters         | Percentage of all people dying outside the hospital with severe infections reported as covid-deaths       | 10        | %           | †22        |
| Parameters         | Iterations (1 to 10,000)                                                                                  | 1         |             | -          |
| Parameters         | Noise (0.01 to 0.2)                                                                                       | 0.01      |             | -          |
| Parameters         | Confidence (5 to 25)                                                                                      | 5         | %           | -          |
| Parameters         | Average sample size for seroprevalence                                                                    | 100       |             | -          |
| Country Area Param | Social Contacts Data                                                                                      | Senegal   |             | †          |
| Country Area Param | Mean Household size                                                                                       | 8.7       | Individuals | †23        |
| Country Area Param | Mean number of infectious migrants per day                                                                | 0         | Individuals | -          |
| Virus Param        | Relative infectiousness of incubation phase                                                               | 10        | %           | -          |
| Virus Param        | Average incubation period (1 to 7 days)                                                                   | 3.5       | Days        | -          |
| Virus Param        | Average duration of symptomatic infection period (1 to 7 days)                                            | 4.5       | Days        | -          |
| Virus Param        | Month of peak infectivity of the virus (1, 2, ..., 12)                                                    | August    |             | -          |
| Virus Param        | Annual variation in infectivity of the virus                                                              | 0         | %           | -          |
| Virus Param        | Average duration of immunity (0.5 to 150)                                                                 | 150       | Days        | -          |
| Virus Param        | Probability upon infection of developing clinical symptoms                                                | 15        | %           | -          |
| Virus Param        | Probability upon hospitalisation of requiring ICU admission                                               | 25        | %           | -          |
| Virus Param        | Probability upon admission to the ICU of requiring a ventilator                                           | 25        | %           | -          |
| Virus Param        | Proportion of hospitalised patients needing O2                                                            | 50        | %           | -          |



|                       |                                                                                                      |        |      |                 |
|-----------------------|------------------------------------------------------------------------------------------------------|--------|------|-----------------|
| Virus Param           | Probability upon infection of developing clinical symptoms if previously vaccinated                  | 3.8    | %    | -               |
| Virus Param           | Probability upon infection of developing clinical symptoms if previously vaccinated and exposed      | 3.8    | %    | -               |
| Virus Param           | Probability upon infection of developing clinical symptoms if previously infected                    | 15     | %    | -               |
| Virus Param           | Probability upon hospitalisation of requiring ICU admission if previously vaccinated                 | 25     | %    | -               |
| Virus Param           | Probability upon hospitalisation of requiring ICU admission if previously vaccinated and exposed     | 25     | %    | -               |
| Virus Param           | Probability upon hospitalisation of requiring ICU admission if previously infected                   | 25     | %    | -               |
| Virus Param           | Probability upon admission to the ICU of requiring a ventilator if previously vaccinated             | 25     | %    | -               |
| Virus Param           | Probability upon admission to the ICU of requiring a ventilator if previously vaccinated and exposed | 25     | %    | -               |
| Virus Param           | Probability upon admission to the ICU of requiring a ventilator if previously infected               | 25     | %    | -               |
| Virus Param           | Probability of infection of people that have recovered from a previous infection                     | 0      | %    | -               |
| Virus Param           | Change in probability of requiring hospitalisation if previously vaccinated                          | 2.8    | %    | -               |
| Virus Param           | Change in probability of requiring hospitalisation if previously infected                            | 2.8    | %    | -               |
| Virus Param           | Change in probability of requiring hospitalisation if previously infected and vaccinated             | 2.8    | %    | -               |
| Virus Param           | Days from seropositive to seronegative                                                               | 100    | Days | -               |
| Hospitalisation Param | Maximum number of hospital surge beds                                                                | 160000 | Beds | -               |
| Hospitalisation Param | Maximum number of ICU beds without ventilators                                                       | 8000   | Beds | -               |
| Hospitalisation Param | Maximum number of ICU beds with ventilators                                                          | 8000   | Beds | -               |
| Hospitalisation Param | Relative percentage of regular daily contacts when hospitalised:                                     | 15     | %    | -               |
| Hospitalisation Param | Scaling factor for infection hospitalisation rate: (0.1 to 5)                                        | 1.248  |      | -               |
| Hospitalisation Param | Probability of dying when hospitalised (not req O2):                                                 | 20     | %    | † <sub>22</sub> |
| Hospitalisation Param | Probability of dying when hospitalised if req O2:                                                    | 20     | %    | † <sub>22</sub> |
| Hospitalisation Param | Probability of dying when denied hospitalisation (not req O2):                                       | 50     | %    | † <sub>22</sub> |
| Hospitalisation Param | Probability of dying when denied hospitalisation if req O2:                                          | 50     | %    | † <sub>22</sub> |
| Hospitalisation Param | Probability of dying when admitted to ICU (not req O2):                                              | 30     | %    | † <sub>22</sub> |
| Hospitalisation Param | Probability of dying when admitted to ICU if req O2:                                                 | 55     | %    | † <sub>22</sub> |
| Hospitalisation Param | Probability of dying when admission to ICU denied (not req O2):                                      | 75     | %    | † <sub>22</sub> |
| Hospital Param        | Probability of dying when admission to ICU denied if req O2:                                         | 75     | %    | † <sub>22</sub> |
| Hospital Param        | Probability of dying when ventilated:                                                                | 75     | %    | -               |
| Hospital Param        | Probability of dying when ventilator denied:                                                         | 95     | %    | -               |
| Hospitalisation Param | Probability of dying when ventilator required and not going to hospital:                             | 95     | %    | -               |
| Hospitalisation Param | Probability of dying when icu required (not O2) and not going to hospital:                           | 90     | %    | -               |
| Hospitalisation Param | Probability of dying when icu required (req O2) and not going to hospital:                           | 90     | %    | -               |

|                                       |                                                                                |      |       |                 |
|---------------------------------------|--------------------------------------------------------------------------------|------|-------|-----------------|
| Hospitalisation Param                 | Duration of hospitalised infection: (1 to 30)                                  | 12   | Days  | -               |
| Hospitalisation Param                 | Duration of ICU infection: (1 to 30)                                           | 6    | Days  | -               |
| Hospitalisation Param                 | Duration of ventilated infection: (1 to 30)                                    | 7    | Days  | -               |
| Self-isolation if Symptomatic         | Adherence:                                                                     | 100  | %     | -               |
| (*Self-isolation) Screening           | Overdispersion: (1, 2, 3, 4 or 5)                                              | 4    | %     | -               |
| (*Self-isolation) Screening           | Test Sensitivity:                                                              | 80   | %     | -               |
| (*Self-isolation) Household Isolation | Days in isolation for average person:                                          | 14   | %     | -               |
| (*Self-isolation) Household Isolation | Days to implement maximum quarantine coverage: (1 to 5)                        | 2    | %     | -               |
| (*Self-isolation) Household Isolation | Decrease in the number of other contacts when quarantined:                     | 20   | %     | -               |
| (*Self-isolation) Household Isolation | Increase in the number of contacts at home when quarantined:                   | 100  | %     | -               |
| Social Distancing                     | Adherence:                                                                     | 100  | %     | -               |
| Handwashing                           | Efficacy: (0-25%)                                                              | 25   | %     | -               |
| Mask Wearing                          | Efficacy: (0-35%)                                                              | 35   | %     | -               |
| Working at Home                       | Efficacy:                                                                      | 85   | %     | -               |
| Working at Home                       | Home contacts inflation due to working from home:                              | 10   | %     | -               |
| School Closures                       | Home contacts inflation due to school closure:                                 | 20   | %     | -               |
| Shielding the Elderly                 | Efficacy:                                                                      | 95   | %     | -               |
| Shielding the Elderly                 | Minimum age for elderly shielding: (0 to 100)                                  | 70   | Years | -               |
| Vaccination                           | Time to reach target coverage (1 to 52)                                        | 4    | Weeks | -               |
| Vaccination                           | Duration of efficacious period                                                 | 100  | Years | -               |
| Vaccination                           | Duration of efficacious period if previously infected                          | 100  | Years | -               |
| Vaccination                           | Efficacy                                                                       | 20   | %     | -               |
| Vaccination                           | Efficacy if previously infected                                                | 80   | %     | -               |
| Mass Testing                          | Sensitivity                                                                    | 80   | %     | -               |
| Mass Testing                          | Isolation days                                                                 | 14   | Days  | -               |
| Dexamethasone                         | Relative risk of dying if needing O2 and taking Dex                            | 82   | %     | -               |
| Dexamethasone                         | Relative risk of dying if needing ventilation and taking Dex                   | 64   | %     | -               |
| Dexamethasone                         | Relative risk of dying if needing but not receiving O2 and taking Dex          | 82   | %     | -               |
| Dexamethasone                         | Relative risk of dying if needing but not receiving ventilation and taking Dex | 64   | %     | -               |
| Dexamethasone                         | Change in ventilation requirement if given Dex                                 | 87   | %     | -               |
| Cost values                           | Daily cost for standard bed                                                    | 280  | US\$  | † <sub>24</sub> |
| Cost values                           | Daily cost for intensive care bed                                              | 630  | US\$  | † <sub>24</sub> |
| Cost values                           | Daily cost for ventilator bed                                                  | 750  | US\$  | † <sub>24</sub> |
| Cost values                           | Cost per vaccine dose                                                          | 23   | US\$  | -               |
| AstraZeneca Vaccine                   | One dose of AstraZeneca protection against the Delta variant                   | 30.7 | %     | † <sub>25</sub> |
| AstraZeneca Vaccine                   | Two doses of AstraZeneca protection against the Delta variant                  | 67.0 | %     | † <sub>25</sub> |

**Table S5:** Experimental matrix

| Age group (years old) | less than 30 |         | 30-40  |         | 40-50   | 50-60   |
|-----------------------|--------------|---------|--------|---------|---------|---------|
|                       | 1 dose       | 2 doses | 1 dose | 2 doses | 2 doses | 2 doses |
| 1                     | 0            | 0.3608  | 0.1205 | 0.2607  | 0.1151  | 0.1429  |
| 2                     | 0.5          | 0.1804  | 0.0603 | 0.1303  | 0.0575  | 0.0714  |
| 3                     | 1            | 0       | 0      | 0       | 0       | 0       |
| 4                     | 0.3608       | 0       | 0.1205 | 0.2607  | 0.1151  | 0.1429  |
| 5                     | 0.1804       | 0.5     | 0.0603 | 0.1303  | 0.0575  | 0.0714  |
| 6                     | 0            | 1       | 0      | 0       | 0       | 0       |
| 7                     | 0.2909       | 0.2909  | 0      | 0.2102  | 0.0928  | 0.1152  |
| 8                     | 0.2473       | 0.2473  | 0.15   | 0.1787  | 0.0789  | 0.0979  |
| 9                     | 0.2036       | 0.2036  | 0.3    | 0.1471  | 0.0649  | 0.0806  |
| 10                    | 0.328        | 0.328   | 0.1095 | 0       | 0.1046  | 0.1299  |
| 11                    | 0.2296       | 0.2296  | 0.0767 | 0.3     | 0.0732  | 0.0909  |
| 12                    | 0.1312       | 0.1312  | 0.0438 | 0.6     | 0.0418  | 0.052   |
| 13                    | 0.2896       | 0.2896  | 0.0967 | 0.2093  | 0       | 0.1147  |
| 14                    | 0.2549       | 0.2549  | 0.0851 | 0.1842  | 0.12    | 0.1009  |
| 15                    | 0.2201       | 0.2201  | 0.0735 | 0.159   | 0.24    | 0.0872  |
| 16                    | 0.2963       | 0.2963  | 0.0989 | 0.214   | 0.0945  | 0       |
| 17                    | 0.274        | 0.274   | 0.0915 | 0.198   | 0.0874  | 0.075   |
| 18                    | 0.2518       | 0.2518  | 0.0841 | 0.1819  | 0.0803  | 0.15    |
| 19                    | 0.2651       | 0.2651  | 0.0886 | 0.1916  | 0.0846  | 0.105   |

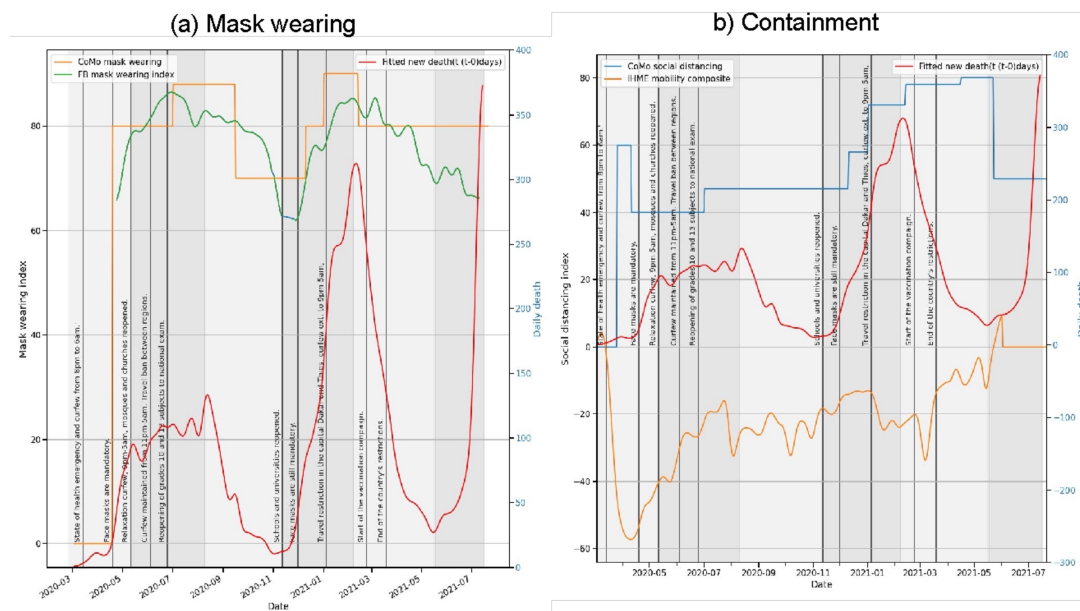

**Figure S2:** Facial mask wearing and containment parameter related to Facebook survey and Health metrics data

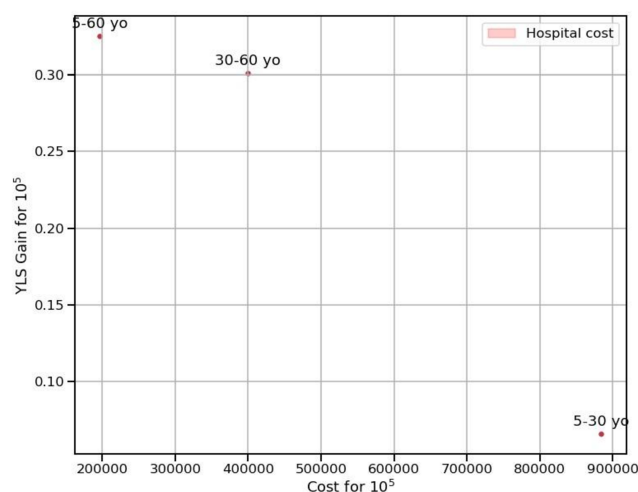

**Figure S3:** Cost-effectiveness analysis according to age group. Cost-effectiveness analysis for the three strategies for allocating the 6M doses, (strategy 1) we vaccinate the most vulnerable people other than  $\leq 60$ : 70% the age group 50–60, (strategy 2) we vaccinate the most representative age groups in the population, corresponding to 50% the age group 5–30, (strategy. 3) we vaccinate 22% of the population of all age groups 5–60. Cost is calculate for 'Only vaccination cost' and 'Only hospitalization cost'.

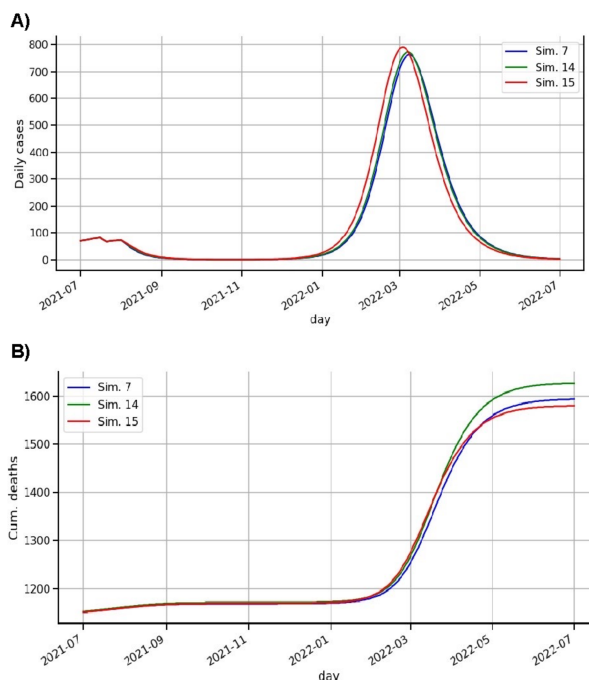

**Figure S4:** Different strategies comparison. Daily cases and cumulative deaths for different the vaccine for strategy 7, 14 and 15. We note that strategy 1 increase the daily cases (Figure S1.A) but decrease the death number (Figure S1.B)

## References

1. World Population Prospects 2019: United Nations; 2020 [Available from: <https://population.un.org/wpp/Download/Standard/Population/>].
2. Prem K, Cook AR, Jit M. Projecting social contact matrices in 152 countries using contact surveys and demographic data. *PLoS Comput Biol* 2017;13(9):e1005697. doi: 10.1371/journal.pcbi.1005697 [published Online First: 2017/09/12]
3. COVID-19: Data 2020 [Available from: <https://www1.nyc.gov/site/doh/covid/covid-19-data.page>].
4. Otto MA. COVID-19 update: Transmission 5% or less among close contacts 2020 [Available from: <https://www.the-hospitalist.org/hospitalist/article/218769/coronavirus-updates/covid-19update-transmission-5-or-less-among-close>].
5. Linton NM, Kobayashi T, Yang Y, et al. Incubation Period and Other Epidemiological Characteristics of 2019 Novel Coronavirus Infections with Right Truncation: A Statistical Analysis of Publicly Available Case Data. *J Clin Med* 2020;9(2) doi: 10.3390/jcm9020538 [published Online First: 2020/02/17]
6. Khalili M, Karamouzian M, Nasiri N, et al. Epidemiological Characteristics of COVID-19; a Systematic Review and Meta-Analysis. *Plos One* 2020;Submitted
7. Bi Q, Wu Y, Mei S, et al. Epidemiology and Transmission of COVID-19 in Shenzhen China: Analysis of 391 cases and 1,286 of their close contacts. *medRxiv* 2020 doi: 10.1101/2020.03.03.20028423
8. Mizumoto K, Kagaya K, Zarebski A, et al. Estimating the Asymptomatic Proportion of 2019 Novel Coronavirus onboard the Princess Cruises Ship, 2020. *medRxiv* 2020:2020.02.20.20025866. doi: 10.1101/2020.02.20.20025866
9. Day M. Covid-19: four fifths of cases are asymptomatic, China figures indicate. *BMJ* 2020;369:m1375. doi: 10.1136/bmj.m1375 [published Online First: 2020/04/02]
10. Coronavirus disease 2019 (COVID-19) pandemic: increased transmission in the EU/EEA and the UK – seventh update [Available from: <https://www.ecdc.europa.eu/sites/default/files/documents/RRA-seventh-update-Outbreakof-coronavirus-disease-COVID-19.pdf>].
11. Vital Surveillances: The Epidemiological Characteristics of an Outbreak of 2019 Novel Coronavirus Diseases (COVID-19) – China, 2020 [Available from: <http://weekly.chinacdc.cn/en/article/id/e53946e2-c6c4-41e9-9a9b-fea8db1a8f51>].
12. Hauser A, Counotte MJ, Margossian CC, et al. Estimation of SARS-CoV-2 mortality during the early stages of an epidemic: a modelling study in Hubei, China and northern Italy. *medRxiv* 2020:2020.03.04.20031104. doi: 10.1101/2020.03.04.20031104
13. Verity R, Okell LC, Dorigatti I, et al. Estimates of the severity of coronavirus disease 2019: a model-based analysis. *Lancet Infect Dis* 2020 doi: 10.1016/s1473-3099(20)30243-7 [published Online First: 2020/04/03]
14. Coronavirus: summary of persons being monitored, persons under investigation, and cases [Available from: <https://floridadisaster.org/globalassets/covid19/dailies/covid-19-data--daily-report-2020-04-25-0956.pdf>].
15. ICNARC report on COVID-19 in critical care [Available from: [icnarc.org](http://icnarc.org)].
16. Zhou F, Yu T, Du R, et al. Clinical course and risk factors for mortality of adult inpatients with COVID-19 in Wuhan, China: a retrospective cohort study. *Lancet* 2020;395:1054-62. doi: 10.1016/S0140-6736(20)30566-3 [published Online First: 2020/03/11]
17. Wang Z, Ji JS, Liu Y, et al. Survival analysis of hospital length of stay of novel coronavirus (COVID19) pneumonia patients in Sichuan, China. *medRxiv* 2020:2020.04.07.20057299. doi: 10.1101/2020.04.07.20057299
18. Huang C, Wang Y, Li X, et al. Clinical features of patients infected with 2019 novel coronavirus in Wuhan, China. *Lancet* 2020;395(10223):497-506. doi: 10.1016/s0140-6736(20)30183-5 [published Online First: 2020/01/28]
19. Petrilli CM, Jones SA, Yang J, et al. Factors associated with hospitalization and critical illness among 4,103 patients with COVID-19 disease in New York City. *medRxiv* 2020:2020.04.08.20057794. doi: 10.1101/2020.04.08.20057794
20. Lewnard JA, Liu VX, Jackson ML, et al. Incidence, clinical outcomes, and transmission dynamics of hospitalized 2019 coronavirus disease among 9,596,321 individuals residing in California and Washington, United States: a prospective cohort study. *medRxiv* 2020:2020.04.12.20062943. doi: 10.1101/2020.04.12.20062943

21. Richardson S, Hirsch JS, Narasimhan M, et al. Presenting Characteristics, Comorbidities, and Outcomes Among 5700 Patients Hospitalized With COVID-19 in the New York City Area. *JAMA* 2020 doi: 10.1001/jama.2020.6775 [published Online First: 2020/04/22]
22. Taieb F, Mbaye KD, Tall B, et al. Hydroxychloroquine and Azithromycin Treatment of Hospitalized Patients Infected with SARS-CoV-2 in Senegal from March to October 2020. *Journal of Clinical Medicine* 2021; 10:2954. doi:10.3390/jcm10132954
23. Agence Nationale de la Statistique et de la Demographie. Rapport définitif RGPHAE-2013. 2013;20.
24. Senegalese Ministry of Health. Real time Covid-19 tracking in Senegal. <https://cartosantesen.maps.arcgis.com/apps/opsdashboard/index.html#/260c7842a77a48c191bf51c8b0a1d3f6> (accessed 5 Nov 2020).
25. Lopez Bernal J, Andrews N, Gower C, et al. Effectiveness of Covid-19 Vaccines against the B.1.617.2 (Delta) Variant. *New England Journal of Medicine* 2021; 385:585–94. doi:10.1056/NEJMoa2108891.
